# Supplementary material
Source: PubMed Central journal article supplement (PMC8186850)
Supplement: mmc1.pdf [file mmc1.pdf]

# THE LANCET

## Microbe

### Supplementary appendix

This appendix formed part of the original submission. We post it as supplied by the authors.

Supplement to: Zoa-Assoumou S, Ndeboko B, Manouana GP, et al. SARS-CoV-2 emerging variants in Africa: view from Gabon. *Lancet Microbe* 2021; published online June 8. [https://doi.org/10.1016/S2666-5247\(21\)00125-7](https://doi.org/10.1016/S2666-5247(21)00125-7).

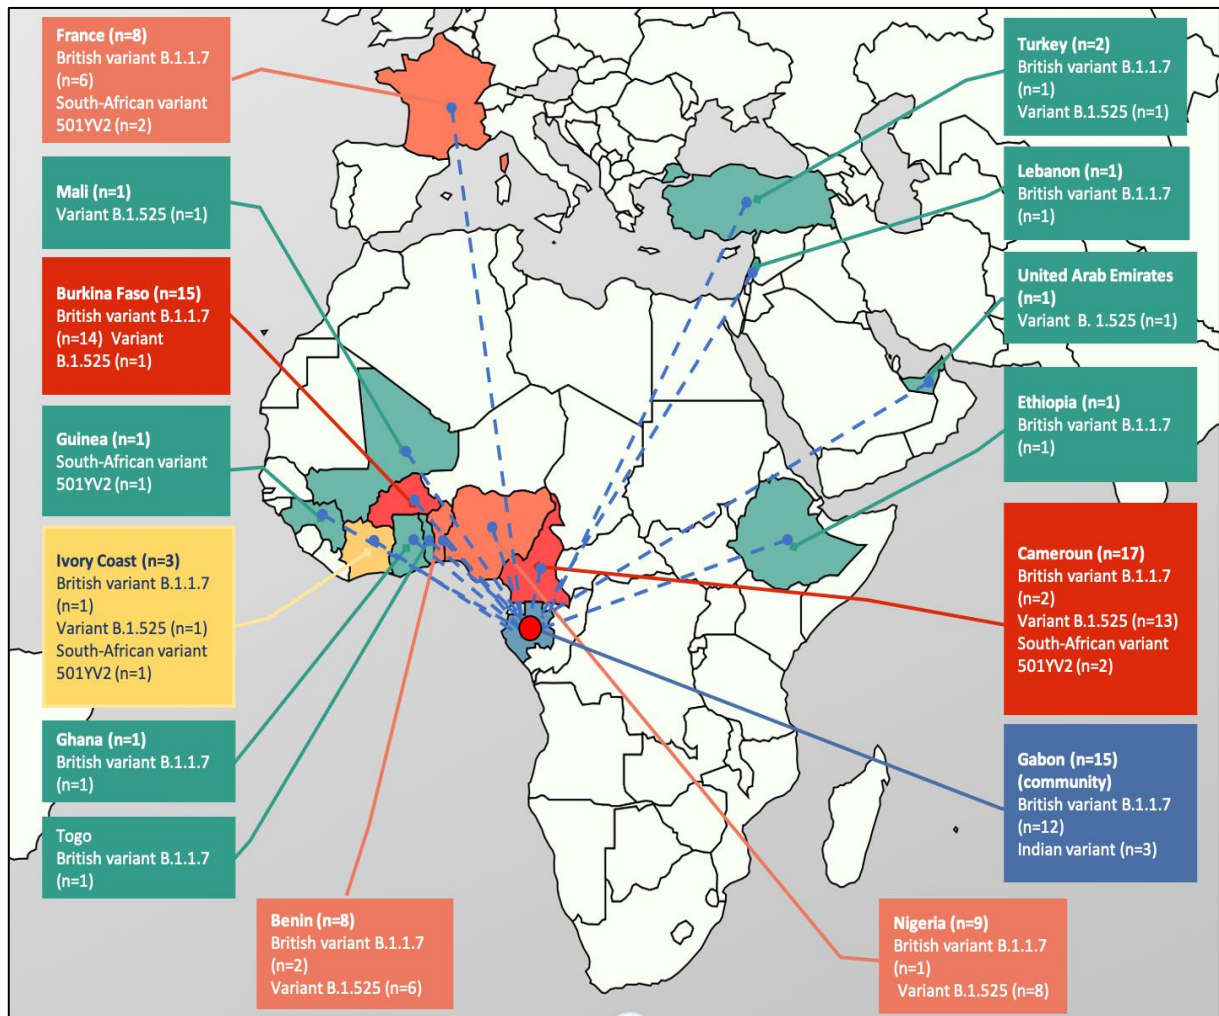

**Figure: Origins of SARS-CoV-2 variants identified through viral genomic surveillance in Gabon**
